## SYNTHESIS OF ACETATE FROM CO<sub>2</sub> IN THE CECUM OF SOME RODENTS

R.A. PRINS and A. LANKHORST

*Laboratory of Veterinary Biochemistry, State University of Utrecht, Utrecht, The Netherlands*

Received 31 January 1977

### 1. Introduction

When we attempted to culture methanogenic bacteria from the cecum of small rodents, such as laboratory rats and guinea-pigs, by serial dilution of cecal contents in an anaerobic rumen fluid agar medium [1], a pressure drop within the tubes was noted when the gas-phase consisted of hydrogen (80%, v/v) and carbon dioxide (20%, v/v). Yet, formation of methane was never observed. Likewise, freshly collected cecal contents did not form methane in short-term incubations, although hydrogen-gas, when added, was rapidly taken up.

To study the possible occurrence in the cecum of the fixation of H<sub>2</sub> and CO<sub>2</sub> into other microbial fermentation products than methane, experiments were carried out with cecal contents from rats, guinea-pigs and rabbits. Fixation of CO<sub>2</sub> in volatile fatty acids (VFA) was measured. A remarkable process, the total synthesis of acetate from CO<sub>2</sub> was found to occur in the cecum. This process is quantitatively important only in the absence of methanogenesis.

### 2. Materials and methods

Cecal contents were taken from female adult Wistar rats which had been fed a commercial pelleted ration (20% crude protein, 5% fat, 4.4% crude fiber, 53.3% residual carbohydrates, 5.5% ash and 11.8 moisture). The complete cecal contents (2.10 g and 1.77 g of wet contents, respectively) were rapidly collected and diluted in 25 ml anaerobic salt solution. The salt solution had the following percentage composition (w/v): KH<sub>2</sub>PO<sub>4</sub> 0.075, K<sub>2</sub>HPO<sub>4</sub> 0.075, NaCl 0.15, (NH<sub>4</sub>)<sub>2</sub>SO<sub>4</sub> 0.075, MgSO<sub>4</sub> · 7 H<sub>2</sub>O 0.015 and CaCl<sub>2</sub> 2 H<sub>2</sub>O 0.015. Just before use this solution had been

heated to boiling and then cooled under a stream of oxygen-free carbon dioxide. Quantities of 4 ml cecal suspension were incubated for 1 h, 2 h, and 4 h under an atmosphere of hydrogen (80%, v/v) and nitrogen gas (20%, v/v) at 39°C in culture-tubes fitted with recessed butyl rubber stoppers. At the start of the incubation 150 µmol NaH<sup>14</sup>CO<sub>3</sub> (14 µCi) were added by injection through the stoppers. After incubation the tubes were analyzed for VFA by gas-chromatography [2] and the presence of radioactivity in these acids was monitored with a gas proportional-counter (Packard Model 894). More accurate measurements of the radioactivity in the fermentation products formate, acetate, propionate, butyrate, lactate and succinate were obtained after separation of the acids by partition chromatography [3]. Gas-analyses were carried out on a Becker 'Permalizer' gas-chromatograph (column Porapak Q, 80–100 µm mesh, 1000 × 4 × 6 mm) using pure N<sub>2</sub> as the carrier gas at a flow-rate of 30 ml/min.

Acetate was isolated from the cecal fluids by partition chromatography [3] and degraded by the Schmidt reaction as described previously [4].

For the experiment reported in table 1, cecal contents from an adult female Wistar rat were diluted in 25 ml of the anaerobic buffer described above. Portions of 4 ml, representing 0.25 g original cecal wet, were incubated for 2 h at 39°C under a 100% CO<sub>2</sub> atmosphere. Prior to incubation, the gas-phase in the closed tubes, to which the NaH<sup>14</sup>CO<sub>3</sub> (150 µmol, 25 µCi) was added, was allowed to equilibrate with the labeled NaHCO<sub>3</sub>. This was done by acidification with dilute HCl followed by neutralization with dilute NaOH. All these and further additions (cecal contents, H<sub>2</sub>, gas or chloroform, see table 1) were introduced by injection through the stoppers. At the end of the incubation the tubes were analyzed for ferment-

TABLE 1

Distribution of radioactivity in volatile fatty acids after incubation of rat cecal contents with  $\text{NaH}^{14}\text{CO}_3$ 

| Additions                                         | (% Label in individual VFA) |         |            |          | Total radioactivity in VFA (dpm $\times 10^{-3}$ ) |
|---------------------------------------------------|-----------------------------|---------|------------|----------|----------------------------------------------------|
|                                                   | Formate                     | Acetate | Propionate | Butyrate |                                                    |
| None (100% $\text{CO}_2$ gas-phase)               | 0.1                         | 18.4    | 79.2       | 2.4      | 1068.5                                             |
| 517 $\mu\text{mol H}_2$                           | 8.1                         | 46.6    | 43.9       | 1.4      | 4721.1                                             |
| 874 $\mu\text{mol H}_2$                           | 14.3                        | 40.2    | 43.2       | 2.3      | 4457.1                                             |
| 517 $\mu\text{mol H}_2$ + 50 $\mu\text{M CHCl}_3$ | 26.0                        | 18.2    | 54.8       | 1.0      | 4215.8                                             |

tation-gases and VFA. In parallel experiments cecal contents from three other rats were likewise diluted in anaerobic salt solution and 4 ml quantities of these suspensions were incubated for 1 h without or with chloroform ( $\text{CHCl}_3$ ) under a 100%  $\text{CO}_2$  atmosphere. At the end of the incubation the tubes were analyzed for fermentation-gases.

A number of studies were carried out with cecal contents from guinea-pigs and rabbits using the incubation procedure described above. Estimates of the rate of acetate synthesis from  $\text{CO}_2$  were made by measuring the rate of incorporation of  $\text{NaH}^{14}\text{CO}_3$  and by comparing the rates of acetate synthesis in the absence and in the presence of the inhibitor  $\text{CHCl}_3$ .

Rumen fluid was obtained from a fistulated lactating dairy-cow few a diet of grass, hay and concentrates. The incubation procedure with  $\text{NaH}^{14}\text{CO}_3$  was as described above for the experiment reported in table 1, except that quantities of undiluted rumen fluid were used at 4 ml/tube.

### 3. Results and discussion

It was found that radioactivity was incorporated into acetate, propionate and butyrate when cecal contents of 2 rats were incubated with  $\text{NaH}^{14}\text{CO}_3$  under an atmosphere of hydrogen (80%, v/v) and nitrogen (20%, v/v). Of the total radioactivity incorporated in these three acids after 2 h incubation, acetate contained 69% and 64%, propionate 23% and 20% and butyrate 8% and 16% for the two rats, respectively. Acetate was found to be uniformly labeled (50.1% label in methyl group). Based on the rate of uptake of  $\text{H}_2$ , as measured in one of these incubations (35  $\mu\text{mol H}_2/\text{g wet cecal contents/h}$ ), it was calculated that

maximally 8.75  $\mu\text{mol}$  acetate were synthesized from  $\text{H}_2$  and  $\text{CO}_2/\text{g wet cecal contents/h}$ , when it is assumed that all of the  $\text{H}_2$  taken up was used for acetate synthesis. It is likely, however, that some  $\text{H}_2$  was consumed in other reactions as well, e.g., in the formation of butyrate from acetate. Based on the rate of incorporation of labeled bicarbonate into acetate, the rate of acetate synthesis from  $\text{CO}_2$  was calculated to be 7.68  $\mu\text{mol acetate/g wet cecal contents/h}$ . When the label in butyrate (probably formed from labeled acetyl groups) is also considered, 8.53  $\mu\text{mol acetate were formed/g wet cecal contents/h}$ . The rate of incorporation of label from bicarbonate into acetate plus butyrate was perfectly linear up to at least 4 h of incubation.

Formation of acetate from  $\text{H}_2$  and  $\text{CO}_2$  in enrichment cultures inoculated with mud has been observed many years ago [5]. The microorganism responsible for this conversion, according to the reaction:

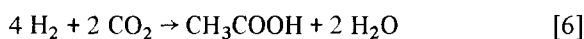

was isolated and named *Clostridium aceticum* [7]. The organism was lost but a related bacterium was later isolated by El Ghazzawi [8] and named *Cl. formico-aceticum* [9]. This organism differed from *Cl. aceticum* by its inability to grow on  $\text{H}_2$  plus  $\text{CO}_2$  and also by the fact that  $\text{H}_2$  did not stimulate the production of acetate in the presence of organic-energy sources. However, another Gram-positive anaerobe which oxidizes hydrogen and reduces carbon dioxide to acetate has recently been isolated from fermenting sea-weed [10]. This organism more closely resembles *Cl. aceticum*. The organisms that are responsible for the synthesis of acetate from  $\text{CO}_2$  in the rat cecum may be related to these isolates but their presence in the intestines of animals has as yet not been described.

In the synthesis of acetate from  $\text{CO}_2$  by *Cl. formico-aceticum* and the metabolically very similar *Cl. thermoaceticum*  $\text{CO}_2$  is first reduced to formate by formate dehydrogenase and this formate carbon is to become the methyl group of acetate [11,12]. The conversion of formate into acetate is carried out by converting the formate to 10-formyltetrahydrofolate which is subsequently reduced to 5-methyltetrahydrofolate and thereafter the methyl group is transferred to an enzyme-bound corrinoid, upon which finally carboxylation of the methyl groups occurs to form acetate. This latter process as well as the transmethylation from methyltetrahydrofolate to the corrinoid enzyme can be inhibited by alkyl-halides [13]. Since formate is an intermediate in the total synthesis of acetate from  $\text{CO}_2$  by the organisms mentioned, it was decided to analyze for this acid too in further experiments as well as for a few other acidic fermentation end-products (lactate, succinate).

Results of an experiment with rat cecal contents, presented in table 1, show (a) that the formation of acetate from  $\text{CO}_2$  was greatly stimulated by the addition of  $\text{H}_2$ , (b) that labeled formate was produced from labeled  $\text{CO}_2$  and (c) that inhibition of acetate synthesis from  $\text{CO}_2$  could be obtained with a low concentration of the simple alkyl-halide chloroform ( $\text{CHCl}_3$ ), while in the presence of this inhibitor a further accumulation of formate occurred. Methane was not produced. Incorporation of label was not seen when the cecal contents were heated for 10 min at  $70^\circ\text{C}$  prior to incubation. No label was incorporated into succinate or lactate. The rate of acetate synthesis from  $\text{CO}_2$  in the presence of added  $\text{H}_2$  was calculated to be  $6 \mu\text{mol}$  acetate/g wet cecal contents/h. The

stimulation of acetate synthesis by added  $\text{H}_2$  suggests that the actual in vivo rates of  $\text{H}_2$  supply may be rate-limiting and, therefore, actual rates of acetate synthesis in the cecum probably are much lower than in  $\text{H}_2$ -supplemented incubations. As can be calculated from the data given in the first 2 lines of table 1, acetate synthesis from  $\text{CO}_2$  in the absence of added  $\text{H}_2$  was about 11 times lower than in the first  $\text{H}_2$ -supplemented incubation.

Inhibition of acetate synthesis from  $\text{CO}_2$  by alkyl halides such as  $\text{CHCl}_3$  resulted in an increased net-evolution of gaseous  $\text{H}_2$ . It was thought that a rapid estimate of the actual rate of acetate synthesis from  $\text{CO}_2$  could easily be obtained by comparing the rates of  $\text{H}_2$  evolution of freshly samples cecal contents in the absence and presence of a low concentration of  $\text{CHCl}_3$ . Rates of  $\text{H}_2$ -evolution by rat cecal contents from three different animals were 550 and 2387, 2160 and 3616, 660 and 2540  $\text{nmol H}_2\text{-gas/g wet cecal contents/h}$  as measured after 1 h of incubation without and with  $50 \mu\text{M CHCl}_3$ , respectively. The differences in net  $\text{H}_2$  production rates can be related to actual rates of acetate synthesis of 0.46, 0.36 and  $0.47 \mu\text{mol acetate/g wet cecal contents/h}$ , according to stoichiometry of the reaction shown above. These rates were slightly lower than the rates measured from incorporation of  $^{14}\text{CO}_2$  in acetate in the cecal samples in parallel incubations, being 0.54, 0.43 and  $0.58 \mu\text{mol acetate/g wet cecal contents/h}$ , respectively.

The following hypotheses may explain the lower rates of acetate synthesis observed in the inhibitor experiments: (a) formate accumulated in the presence of  $\text{CHCl}_3$  (see table 1), (b) synthesis of acetate from  $\text{CO}_2$  might not be completely blocked by  $50 \mu\text{M}$

TABLE 2

Distribution of radioactivity in acidic fermentation products after incubation of bovine rumen fluid with  $\text{NaH}^{14}\text{CO}_3$

| Additions                                            | (% Label in individual acids) |         |            |          |         | Total radioactivity in acids (dpm $\times 10^{-3}$ ) |
|------------------------------------------------------|-------------------------------|---------|------------|----------|---------|------------------------------------------------------|
|                                                      | Formate                       | Acetate | Propionate | Butyrate | Lactate |                                                      |
| None (100% $\text{CO}_2$ gas-phase)                  | 0.1                           | 5.0     | 91.3       | 3.6      | 0       | 302.3                                                |
| 517 $\mu\text{mol H}_2$                              | 76.8                          | 4.0     | 15.5       | 2.0      | 1.7     | 3117.2                                               |
| 874 $\mu\text{mol H}_2$                              | 75.4                          | 3.7     | 13.4       | 6.7      | 1.8     | 3103.1                                               |
| 517 $\mu\text{mol H}_2$<br>+ 50 $\mu\text{M CHCl}_3$ | 80.0                          | 0.9     | 15.0       | 4.1      | 0       | 3428.8                                               |

$\text{CHCl}_3$  (see table 1), (c) the incubation time was too long or (d) the stoichiometry of the  $\text{H}_2$ -production differed from the equation shown above. This latter phenomenon has also been observed in the case of inhibition of rumen-methanogenesis by methane analogues [14]. This may be caused by direct inhibition of  $\text{H}_2$ -production by  $\text{CHCl}_3$  or by the fact that other  $\text{H}_2$ -consuming reactions become more important when the  $\text{H}_2$ -concentration is raised.

Further studies showed that acetate synthesis from  $\text{CO}_2$  occurred in a similar way in the cecum of guinea-pigs and rabbits. Rates of acetate synthesis as measured by incorporation of  $\text{NaH}^{14}\text{CO}_3$  were found to range 0.3–0.8  $\mu\text{mol}$  acetate/g wet cecal contents/h or 1.5–5.1  $\mu\text{mol}$ /g dry cecal material/h. Measurements based on inhibitor experiments (50  $\mu\text{M}$   $\text{CHCl}_3$ ) again gave 20–30% lower estimates. In some rabbits a slight formation of methane was observed and in these animals the rates of incorporation of  $\text{CO}_2$  into acetate in the cecal contents were much reduced. Similarly, methanogenic rumen contents obtained from fistulated cattle incorporated labeled  $\text{CO}_2$  rapidly into formate but acetate synthesis from  $\text{CO}_2$  was a minor process (table 2). It is suggested that the methanogenic bacteria are capable of competing very successfully for

molecular hydrogen with the as yet unknown organisms that synthesize acetate from  $\text{CO}_2$ .

## References

- [1] Smith, P.H. and Hungate, R.E., (1958) *J. Bacteriol.* 75, 713.
- [2] Van Enaeme, C.C., Bienfait, J.M. and Lambot, O., (1965) *Ann. Med. Vet.* 8, 569.
- [3] Hungate, R.E., Smith, W., Bauchop, T., Yu, I. and Rabinowitz, J.C. (1970) *J. Bacteriol.* 102, 389.
- [4] Prins, R.A. and van der Meer, P. (1976) *Antonie van Leeuwenhoek* 42, 25.
- [5] Fischer, F., Lieske, R. and Winzer, K. (1931) *Biochem. Z.* 236, 241.
- [6] Wieringa, K.T. (1936) *Antonie van Leeuwenhoek* 3, 263
- [7] Wieringa, K.T. (1940) *Antonie van Leeuwenhoek* 6, 251
- [8] El Ghazzawi, E. (1967) *Arch. Mikrobiol.* 57, 1.
- [9] Andreesen, J.R. Gottschalk, G. and Schlegel, H.G. (1970) *Arch. Mikrobiol.* 72, 154.
- [10] Schobert, S.M. and Balch, W.E. (1975) *Abstr. Annu. Meet. Am. Soc. Microbiol.* 190.
- [11] Ljungdahl, L. and Wood, H.G. (1969) *Annu. Rev. Microbiol.* 23, 515.
- [12] O'Brien, W.E. and Ljungdahl, L.G. (1972) *J. Bacteriol.* 109, 626.
- [13] Ghambeer, R.K., Wood, H.G. Schulman, M. and Ljungdahl, L. (1974) *Arch. Biochim. Biophys.* 143, 471
- [14] Bauchop, T. (1967) *J. Bacteriol.* 94, 171.
